# Supplementary material
Source: Springer Nature journal article supplement (https://www.springermedizin.de/resource/supplementary/12936_2006_285_MOESM1_ESM.pdf/9547094)

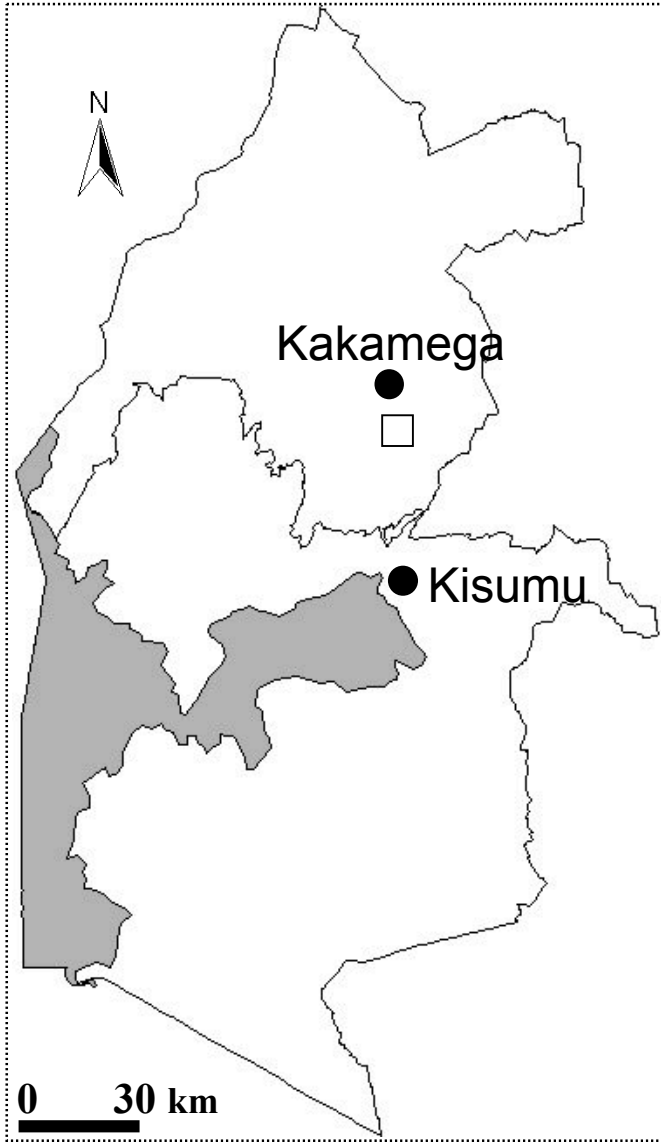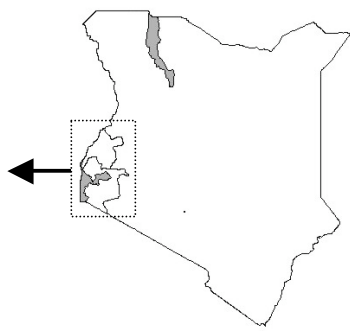

- Major town
- Lake Victoria

Supplement: MOESM1 [file 9547094]
